# Supplementary material for: Psychometric Property of Afaan-Oromo Version of Hill-Bone High Blood Pressure Therapy compliance Scale among Ethiopian Hypertensive Patients
Source: Research Square preprint supplement (doi:10.21203/rs.3.rs-8457807/v1), 2026-01-23
Supplement: Supplementary file 1 [file 30fd6ae296a62e3822fd14cb.docx]

| No.  **Tartiiba** | Item  **Gaaffii** | Response:  **Deebii**   1. All of the Time   **Yeroo hunda**   1. Most of the Time   **Yeroo baay’ee**   1. Some of the Time   **Yeroo tokko tokko**   1. None of the Time   **Gonkummaa** |
| --- | --- | --- |
| 1 | How often do you forget to take your high blood pressuremedicine?  **Yeroo meeqa qoricha dhiibbaa dhiigaa keessan fudhachuu dagattu?** | |
| 2 | How often do you decide NOT to take your high blood pressuremedicine?  **Yeroo meeqa qoricha dhiibbaa dhiigaa keessan fudhachuu dhiisuuf murteessitanii beektu?** | |
| 3 | How often do you eat salty food?  **Yeroo meeqa nyaata soogiddi itti baay’ate nyaattanii beektu?** | |
| 4 | How often do you shake salt on your food before you eat it?  **Nyaata keessan osoo hin nyaatin dura yeroo meeqa soogidda dabaltanii itti firfirsitu ?** | |
| 5 | How often do you eat fast food?  **Nyaata ariifachiisaa yeroo meeqa nyaattanii beektu?** | |
| 6 | How often do you make the next appointment before you leave the doctor’s office?*  **Kutaa itti yaalamtan keessaa ba’uu keessaniin dura yeroo meeqa beellama itti aanu qabaattanii baatu?*** | |
| 7 | How often do you miss scheduled appointments?  **Yeroo meeqa beellama keessan irraa haftanii beektu?** | |
| 8 | How often do you forget to get prescriptions filled?  **Yeroo meeqa qoricha isiniif ajajame fudhachuu dagattanii beektu?** | |
| 9 | How often do you run out of high blood pressurepills?  **Yeroo meeqa qorichi dhiibbaa dhiigaa isin jalaa dhumee beeka?** | |
| 10 | How often do you skip your high blood pressuremedicine before you go to the doctor?  **Gara ogeessa fayyaa beellamaaf osoo hin deemin dura, yeroo meeqa qoricha dhiibbaa dhiigaa keessan osoo hin fudhatin irra darbitanii beektu?** | |
| 11 | How often do you miss taking your high blood pressurepills when you feel better?  **Yeroo miirri fayyummaa isinitti dhaga’amu, qoricha dhiibbaa dhiigaa keessan yeroo meeqa fudhachuu dhiistanii beektu?** | |
| 12 | How often do you miss taking your high blood pressure pills when you feel sick?  **Yeroo miirri dhukkubii isinitti dhaga’amu, qoricha dhiibbaa dhiigaa keessan yeroo meeqa fudhachuu dhiistanii beektu?** | |
| 13 | How often do you take someone else’s high blood pressurepills?  **Qoricha dhiibbaa dhiigaa nama biraa yeroo meeqa fudhattanii beektu?** | |
| 14 | How often do you miss taking your **high blood pressure** pills when you are careless?  **Dhukkubii dhiibbaa dhiigaa keessan akka salphaatti ilaaluun yookiin dhibaa’umaadhaan, qoricha dhiibbaa dhiigaa keessan yeroo meeqa fudhachuu dhiistanii beektu?** | |

* Reverse coding Note:

Scale and subscale scores are calculated by summing individual items. Reducing sodium intake subscale: Items 3,4,5

Appointment keeping subscale: Items 6,7

Medication taking subscale: Items 1, 2, 8,9,10,11,12,13,14

**Cause of non-compliance to anti-hypertensive medication (Culig scale)**

| No.  **Tartiiba** | Item (cause of non compliance)  **Gaaffii (Sababii qoricha seeraan fudhachuu dhabuu)** | Response:  **Deebii**   1. Never   **Gonkummaa**   1. Very rare (1-2 yearly)   **Yeroo baayee xiqqaa (waggaatti yeroo 1-2)**   1. Some of the time (3-5 yearly)   **Yeroo muraasa/ Yeroo tokko tokko (waggaatti yeroo 3-5)**   1. Often (> 5 yearly)   **Yeroo baayee/ hedduu (waggaatti yeroo 5 nii ol)** |
| --- | --- | --- |
| 1 | I was not at home  **Ani mana waan hin jirreef** | |
| 2 | The drug was not available due to short supply  **Qorichi kun sababa hanqina dhiyeessiitiin waan dhabameef** | |
| 3 | I just forgot  **Waanan dagadheef** | |
| 4 | I take a number of drugs several times a day  **Guyyaatti qoricha hedduu yeroo heddu waanan fudhadhuuf** | |
| 5 | I wanted to avoid side effects  **Miidhaa cinaa yookiin rakkoo qorichi fidu irraa bilisa ta’uu waanan barbaadeef** | |
| 6 | I did not want other people seeing me taking drug  **Namoonni biroo qoricha fudhachaa akkan jiru akka na argan waan hin barbaannef** | |
| 7 | My doctor frequently changes my therapy  **Ogeessi fayyaa koo yeroo baayʼee qoricha koo na jalaa jijjiira waan ta’eef** | |
| 8 | I felt the drug to be toxic/harmful  **Qorichi kun summii/miidhaa akka qabu waan natti dhaga'ameef** | |
| 9 | I was sleepy at medication time  **Yeroo qoricha fudhachuu qabutti hirribatu na fudhata waan taheef** | |
| 10 | I had cold  **Dhukkuba qorraan qaba waan ta’eef** | |
| 11 | I felt depressed or broken  **Dhiphina ykn abdii kutannaattu natti dhagahame** | |
| 12 | I had problems with medication timing  **Yeroo qoricha itti fudhachuu qabu mijeessuu irratti rakkoon waan na mudateef** | |
| 13 | I consumed all of it  **Hundaa isaa waanan liqimseef** | |
| 14 | I felt well  **Miiri fayyummaa waan natti dhagahameef** | |
| 15 | I was afraid of developing **drug** dependence  **Hirkatummaa qoricha waanan sodaadheef** | |
| 16 | The drug was too expensive  **Gatiin qorichaa guddaa yookin qaalii waan tureef** | |
